# Supplementary material for: CdS Nanoparticles Supported by Cobalt@Carbon-Derived MOFs for the Improved Adsorption and Photodegradation of Ciprofloxacin
Source: MDPI journal article supplement (doi:10.3390/ijms241411383), 2023-07-13
Supplement: s1 [file s1]

---

## Supporting Information

# CdS nanoparticles supported by Cobalt@Carbon-derived MOFs for the improved adsorption and photodegradation of Ciprofloxacin

Mi Li<sup>1,2</sup>, Qin Fang<sup>1,2</sup>, Yan Lai<sup>1,2</sup>, Luying Chen<sup>1,2</sup>, Qiucheng Fu<sup>1,2</sup>, Jiao He<sup>1,2</sup>, Yongjuan Chen<sup>1,2</sup>, Liang Jiang<sup>1,2</sup>, Zhiying Yan<sup>1,2\*</sup>, Jiaqiang Wang<sup>2,3\*</sup>

1. School of Chemical Sciences & Technology, Yunnan University, Kunming 650091, P. R. China

2. Yunnan Province Engineering Research Center of Photocatalytic Treatment of Industrial Wastewater, Yunnan University, Kunming 650091, P. R. China.

3. School of Materials & Energy, Yunnan University, Kunming 650091, P. R. China.

---

### Preparation of ZIF-8 and ZIF-8@ZIF-67.

ZIF-8 polyhedrons were prepared according to a previously reported method, with some modifications [1]. Briefly, 40 mL of methanol containing 6 mmol of  $\text{Zn}(\text{NO}_3)_2 \cdot 6\text{H}_2\text{O}$  was added to 20 mL of methanol containing 24 mmol of 2-methylimidazole, and the mixture was aged at room temperature for 24 h. Afterward, the ZIF-8 polyhedrons were collected via centrifugation, washed with ethanol several times, then dried at 60 °C.

ZIF-8@ZIF-67 polyhedrons were prepared according to a previously reported method, with some modifications [1]. Briefly, 300 mg of  $\text{Co}(\text{NO}_3)_2 \cdot 6\text{H}_2\text{O}$  and 20 mL of methanol solution containing 756 mg of 2-methylimidazole were quickly poured into 60 mL methanol solution containing 200 mg of ZIF-8, and the mixture was stirred at room temperature for 24 h. The generated purple ZIF-8@ZIF-67 particles were collected via centrifugation, washed with ethanol several times, then dried at 60 °C.

---

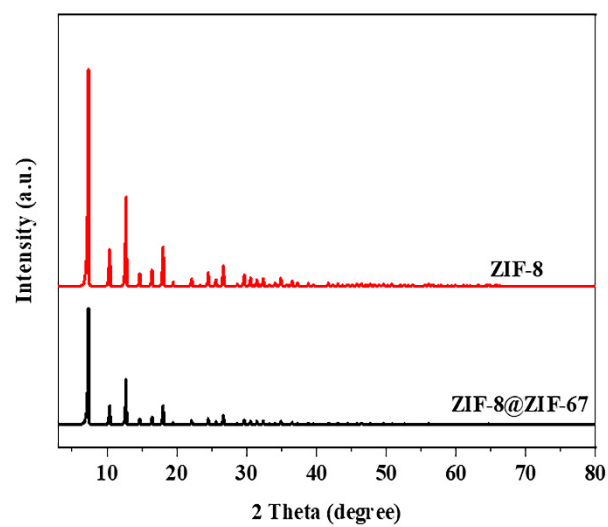

**Figure S1.** XRD patterns of as-prepared ZIF-8 and ZIF-8@ZIF-67.

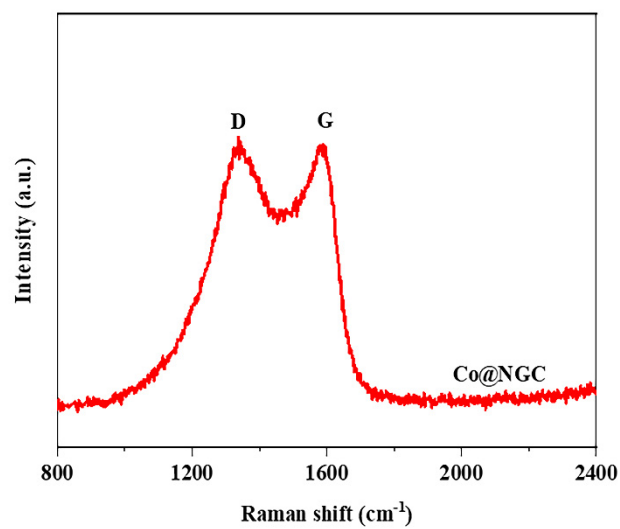

**Figure S2.** Raman spectrum of Co@C.

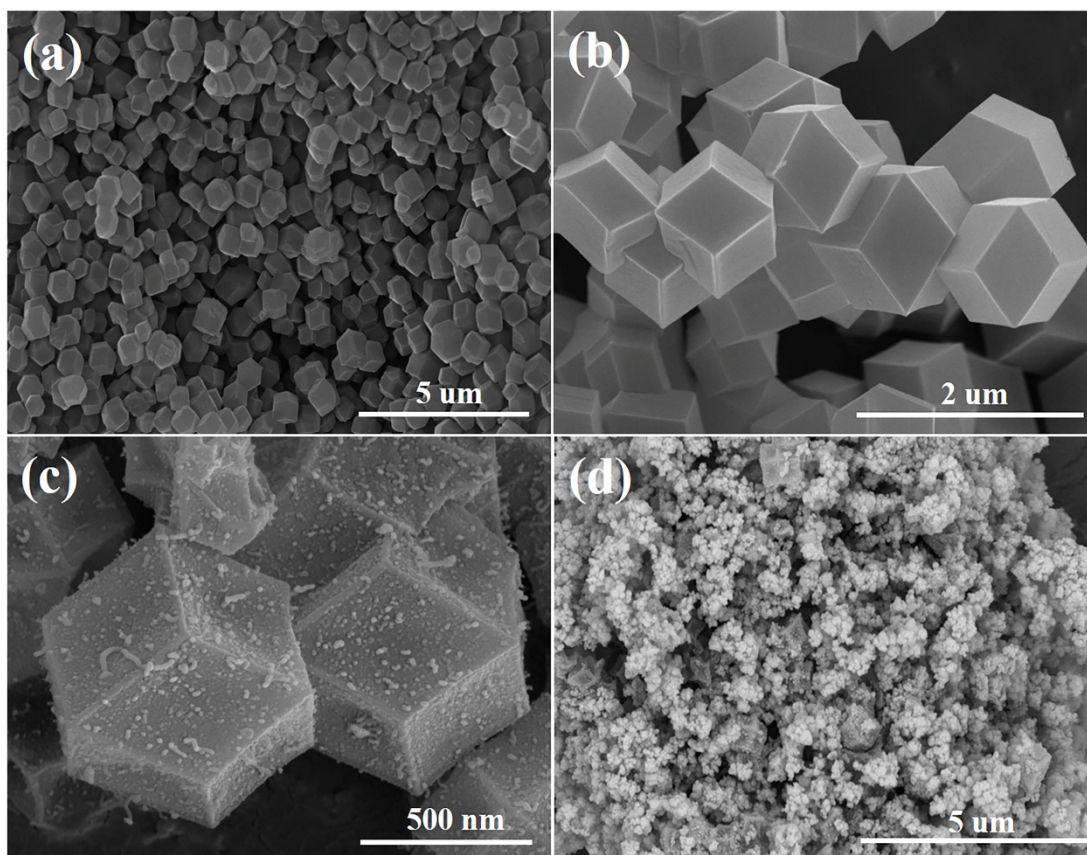

**Figure S3.** (a) SEM images of ZIF-8, (b) ZIF-8@ZIF-67, (c) Co@C, and (d) CdS/Co@C-7.

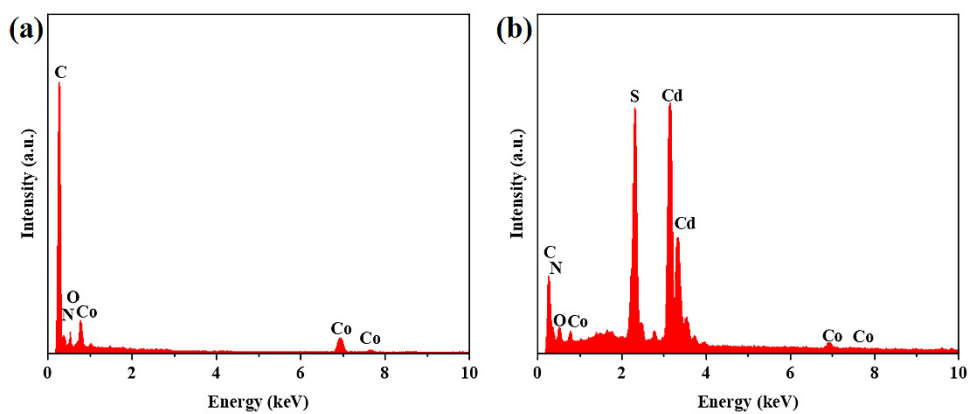

**Figure S4.** EDS spectra of (a) Co@C and (b) CdS/Co@C-7.

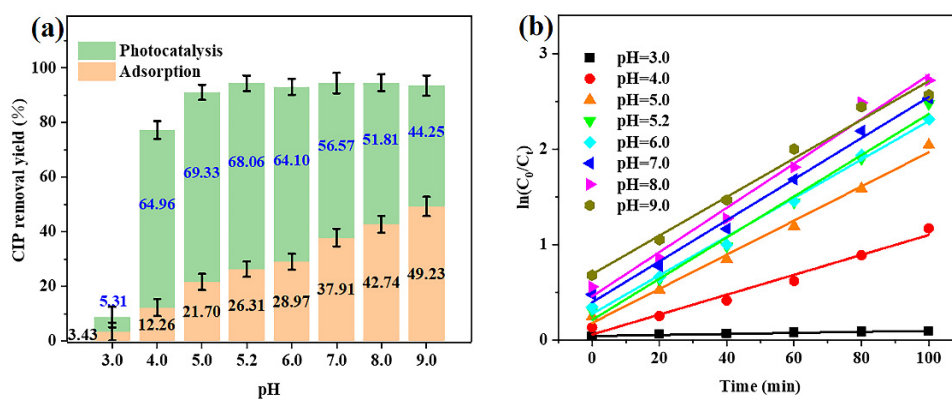

**Figure S5.** (a) The CIP removal yield over CdS/Co@C-7. (b) The corresponding pseudo-first-order kinetic curves for CIP photocatalytic degradation over CdS/Co@C-7.

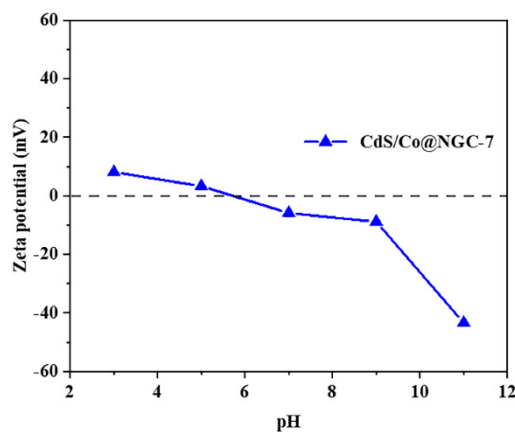

**Figure S6.** Variation of the Zeta potential of CdS/Co@C-7 suspended in water as a function of pH.

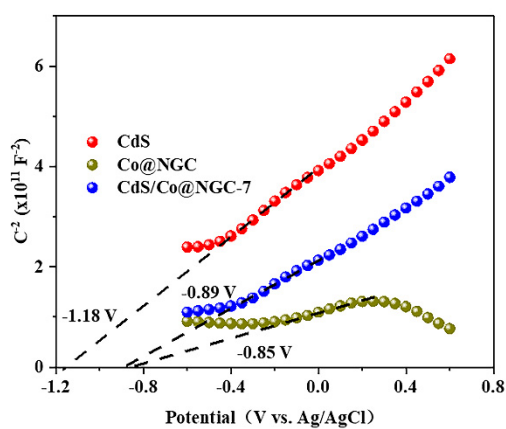

**Figure S7.** Mott-Schottky plots corresponding to CdS and Co@C.

**Table S1. Summary of textural and optical properties of the samples.**

| Samples     | $S_{\text{BET}}$ ( $\text{m}^2\cdot\text{g}^{-1}$ ) | Pore volume ( $\text{cm}^3\cdot\text{g}^{-1}$ ) | Pore size (nm) |
|-------------|-----------------------------------------------------|-------------------------------------------------|----------------|
| CdS         | 32.46                                               | 0.11                                            | 13.04          |
| CdS/Co@C-1  | 39.10                                               | 0.12                                            | 11.15          |
| CdS/Co@C-3  | 49.24                                               | 0.16                                            | 12.60          |
| CdS/Co@C-5  | 53.18                                               | 0.12                                            | 11.31          |
| CdS/Co@C-7  | 55.69                                               | 0.11                                            | 10.66          |
| CdS/Co@C-10 | 64.06                                               | 0.14                                            | 9.96           |
| Co@C        | 288.34                                              | 0.16                                            | 6.18           |

**Table S2. The band gap and photocatalytic activities of as-prepared samples.**

| Samples     | $E_g$ (eV) | $k$ ( $\times 10^{-2} \text{ min}^{-1}$ ) | $R^2$ |
|-------------|------------|-------------------------------------------|-------|
| CdS         | 2.44       | 0.495                                     | 0.989 |
| CdS/Co@C-1  | 2.43       | 0.784                                     | 0.990 |
| CdS/Co@C-3  | 2.43       | 1.095                                     | 0.988 |
| CdS/Co@C-5  | 2.41       | 1.475                                     | 0.996 |
| CdS/Co@C-7  | 2.38       | 2.199                                     | 0.993 |
| CdS/Co@C-10 | 2.39       | 1.756                                     | 0.991 |
| Co@C        | 0.86       | 0.084                                     | 0.987 |

## References

1. Pan, Y.; Sun, K.; Liu, S.; Cao, X.; Wu, K.; Cheong, W.-C.; Chen, Z.; Wang, Y.; Li, Y.; Liu, Y., et al. Core-Shell ZIF-8@ZIF-67-Derived CoP Nanoparticle-Embedded N-Doped Carbon Nanotube Hollow Polyhedron for Efficient Overall Water Splitting. *J. Am. Chem. Soc.* **2018**, *140*, (7), 2610-2618.
